# Supplementary material for: Excellent lithium storage performance of Ni-MOFs/GO composite as anode in lithium ion battery
Source: Royal Society of Chemistry journal article supplement (doi:10.1039/d4nj03790a), 2024-01-01
Supplement: d4nj03790a1.pdf [file d4nj03790a1.pdf]

### **Supplementary information**

2,3,6,7,10,11-hexaaminotriphenylene hexahydrochloride (HATP·6HCl, 98%) is purchased from Changwei Chemical Reagent Company (Shanghai, China) and the GO is purchased from Tanfeng Graphene Technology Co. Ltd. (Suzhou, China). The NiCl<sub>2</sub>·6H<sub>2</sub>O (analytical grade) is obtained from Richjoint Chemical Reagents Company (Shanghai, China). All reagents and solvents in this study were obtained commercially without further purification.
